# Supplementary material for: Intrinsic cellular signaling mechanisms determine the sensitivity of cancer cells to virus-induced apoptosis
Source: PubMed Central journal article supplement (PMC5111159; doi:10.1038/srep37213), 2016-11-16
Supplement: srep37213-s1.pdf [file srep37213-s1.pdf]

**Intrinsic cellular signaling mechanisms determine the sensitivity of cancer cells to virus-induced apoptosis**

Yunfei Wang, Dawei Li, Jian Luo, Guimei Tian, Lisa Y. Zhao, and Daiqing Liao

**Supplementary Information**

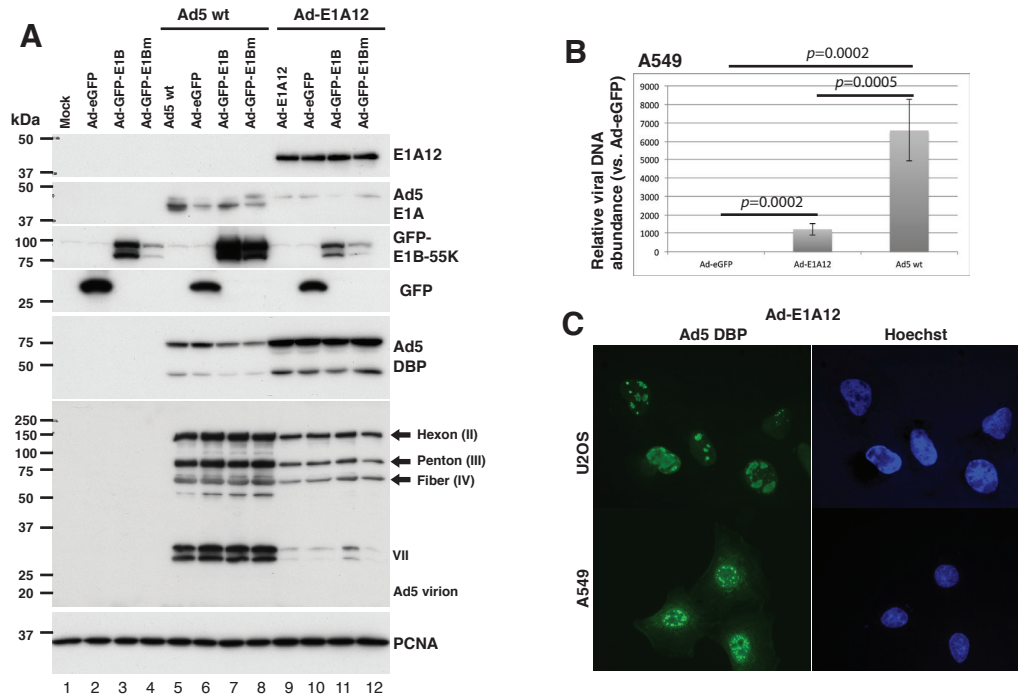

**Figure S1. Replication of Ad-E1A12 in various cancer cell lines.** A, A549 cells were infected with the indicated combinations of adenoviruses and the infected cells were harvested at 48hpi for Western blotting. Viruses expressing the E1B 55-kDa (Ad-GFP-E1B) or its mutant with the S476/477A mutations (Ad-GFP-E1Bm) were superinfected with wt Ad5 or Ad-E1A12 to assess whether E1B-55-kDa expression would enhance Ad reproduction. B, genome replication of wt Ad5 and Ad-E1A12 in A549 cells. The relative abundance of viral genomic DNA at 48hpi was determined using quantitative real-time PCR. The P-value was determined with Student's t-test. C, viral replication centers in Ad-E1A12-infected cells. The indicated cell lines were infected with Ad-E1A12 and the cells were fixed for immunostaining with antibody against DBP and counter stained with the Hoechst dye.

Wang et al., Supplemental Figure S2

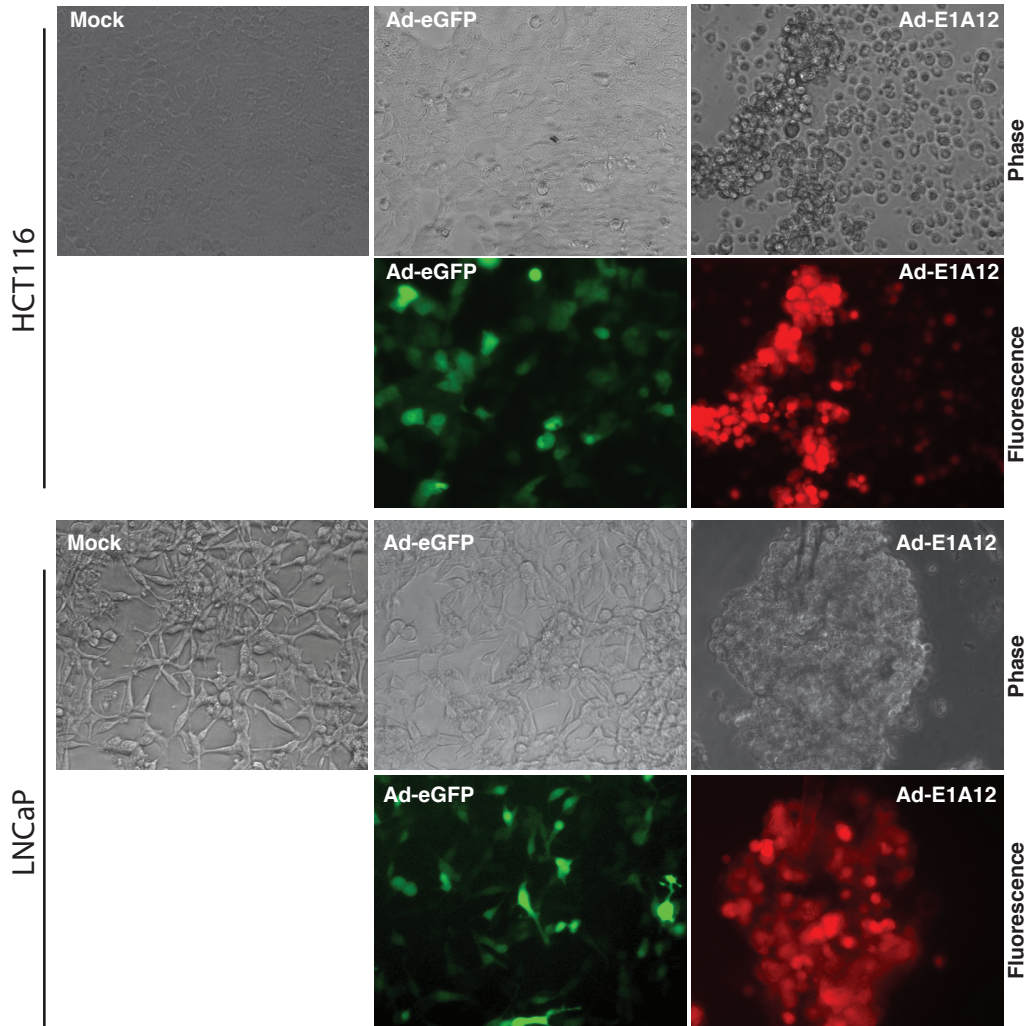

**Figure S2. Ad-E1A12 infection triggers detachment of HCT116 and LNCaP cells.** The cells were infected with Ad-eGFP or Ad-E1A12. The infected cells were photographed at 48hpi. Representative phase and fluorescence images of the cell cultures are shown. Note the detachment of Ad-E1A12-infected cells.

Wang et al., Supplemental Figure S3

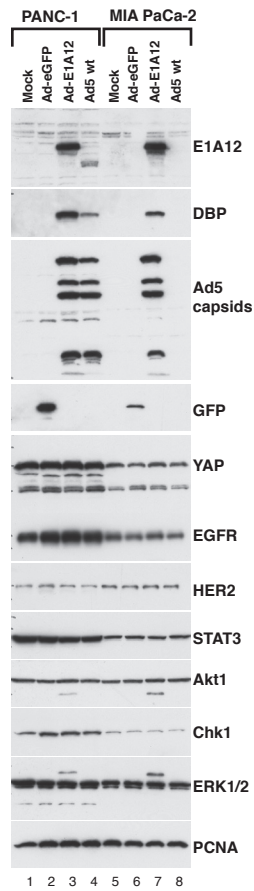

**Figure S3. Ad-E1A12 infection does not induce anoikis in the PANC-1 and MIA PaCa-2 pancreatic cancer cell lines.** The cells lines were infected with an indicated virus (100 vps/cell). The cells were harvested at 48hpi for Western blotting with antibodies against the indicated proteins.
